## **Reduction in major transcription factor binding domain families during the evolution of the avian lineage**

Allie M. Graham<sup>1,2\*</sup> and Jason S. Presnell<sup>1</sup>

<sup>1</sup> Oregon State University, Department of Integrative Biology, Corvallis, OR

<sup>2</sup> University of Miami, Coral Gables, FL

\* Corresponding author: [grahaall@oregonstate.edu](mailto:grahaall@oregonstate.edu)

## **ABSTRACT**

Transcription factors (TF) are characterized by certain DNA binding-domains (DBD) which regulate their binding specificity, and thus their ability to effect a change on gene expression of their downstream targets. TFs are central to organismal development, and morphology; therefore, they potentially are instrumental in producing phenotypic diversity. We measured TF abundance of 49 major TF DBD families in 48 bird genomes, which we then compared with 5 reptile genomes, in an effort to assess the degree to which TF DBD are potentially connected to increased phenotypic diversity in the avian lineage. We hypothesized that there would be increased TF DBD abundance in multiple TF families correlated with the increased phenotypic diversity found in birds; instead ultimately, we see a general loss of major TF DBD families, reflecting general genome reductions seen between reptiles and birds, with largest losses in TF DBD families associated with multiple developmental (feather, sex-determination, body-plan, immune, blood) and metabolic processes.

## INTRODUCTION

Transcription factors (TFs) are proteins that bind to DNA in a sequence-specific manner and enhance or repress gene expression. In response to a broad range of stimuli, TFs coordinate the regulation of gene expression of essential for defining morphology, functional capacity, and developmental fate at the cellular level. Although, transcription factor binding domains are very well conserved, the other associated domains, largely responsible for protein-protein interactions, readily diverge among homologs. Therefore, the structure and function of transcription factors are inherently modular. This attribute is thought to allow gene-regulatory networks to evolve via transcription factor changes (Wray 2007; Jarvela & Hinman 2015), and could account for the seemingly large phenotypic difference between closely related groups (Liu *et al.* 2014; Nadimpalli *et al.* 2015).

A long-standing question has been whether changes in gene regulation or protein sequence have made a larger contribution to phenotypic diversity seen between species (Britten & Davidson 1969; King & Wilson 1975). Now, it is understood that changes in cis-regulatory systems more often underlie the evolution of morphological diversity than gene duplication/loss or protein function (Levine & Tjian 2003; Carroll 2008; Wittkopp & Kalay 2011). These cis-regulatory elements (CREs) typically regulate gene transcription by functioning as binding sites for transcription factors. However, another avenue would be through whole-scale changes in transcription factor function through changes in domain modularity, either through their DNA-binding domains (DBD) and/or through other domains usually involved in protein-protein interactions (Wagner & Lynch 2008, 2010; Schmitz *et al.* 2016), otherwise known as trans-regulatory elements.

Ultimately, phenotypic variation from individual organisms to broad groups has been attributed to a combination changes associated with cis- and trans-regulatory elements (Schmitz *et al.* 2016).

Although transcription factor diversity has been correlated with increased “complexity” across the eukaryotic lineage (Charoensawan *et al.* 2010; de Mendoza *et al.* 2013; Lehti-Shiu *et al.* 2016), no study has measured such transcription factor diversity within a specious, but highly related, animal clade. However, recently, forty-eight avian genomes representing all the major families of birds (Aves) have recently been published (OBrien *et al.* 2014; Zhang *et al.* 2014a; Eöry *et al.* 2015), providing a unique opportunity to do just that. Birds represent one of the most diverse vertebrate lineages, and has the distinction of being the tetrapod class with the most living species, with half of them being Passerines (over 10,000 species) (Gill & Wright 2006). Not only do birds live worldwide and range in size (5 cm - 2.75 m), but also vary widely in morphology, physiology and behavior, and have unique features (ie. feathers). From a genomic standpoint, these organisms have relatively low rates of gene gain/loss in gene families and have similarly sized genomes (0.91-1.3 Gb) (Zhang *et al.* 2014b).

Therefore, in this study, we aimed to characterize the major metazoan TF families by their major DNA-binding Domains (DBD) in the 48 avian and 5 reptile genomes. This is the first study to analyze the evolutionary history and phylogenetic distribution of transcription factors in the diverse genomes available for avian group, and the closely related reptile lineage. We hypothesized that there would be increased TF DBD abundance in multiple TF families, correlated with the increased phenotypic diversity found in birds; however, we see no such evidence, and instead see wholesale loss within

major TF DBD families, potentially reflecting general genome reductions seen between reptiles and birds. The largest losses in TF DBD families associated with multiple developmental (feather, sex-determination, body-plan, immune, blood) and metabolic processes.

## **MATERIALS AND METHODS**

### *TF DBD Identification*

We obtained data on complete genomes from publicly available databases for birds (<http://avian.genomics.cn/en/jsp/database.shtml>) and reptiles (<http://crocgenomes.org/>). A PfamScan was performed on the protein models, using a custom database containing the major DBD families, and selecting the gathering threshold option as a conservative approach, which can underestimate total counts for some domains but minimizes false positives (Eddy 2011). We looked for the presence major DBDs, which were TFs were selected based on previous studies (de Mendoza *et al.* 2013). For the major DBDs, in all cases, we defined a one-to-one relationship between TF class and DBD class (ie. Non-duplicates). In cases in which two or more DBDs were found in the same gene, those were relegated to a separate list, compared to those who showed only one DBD. DBDs that appeared just in combination with other DBDs (ie. Duplicates) were analyzed separately, to avoid an overestimation of TF numbers, due to problems detecting repeated domains (de Mendoza *et al.* 2013). We counted the number of genes/proteins containing a given DBD, and the number of different associated domain architectures associated with each DBD in each species, via custom macros.

### *Transcription Factor DBD enrichment and characterization*

We tested for enrichment of TF numbers using a Mann-Whitney U test, with a significance threshold of  $P < 0.01$ , as performed by de Mendoza *et al.* (2013). The protein sequences were then filtered to include sequences of the DBD that were significantly different between reptiles and birds; these sequences were then subjected to a BLAST search, mapped, annotated, and analyzed using Blast2GO basic version (Conesa *et al.* 2005). Gene Ontology (GO) term maps were created for biological processes, cellular and molecular functions, with a threshold of 10% (ie. 1,500).

## **RESULTS**

### *Transcription Factor DBD Identification*

Across the 49 different DNA binding domains, a total of 34,318 non-duplicate and 19,668 duplicate proteins were identified (SUPP Tables). In order to ascertain which families may have experienced family expansion or contraction, comparisons were made against the 5 reptile genomes (crocodile, alligator, gharial, green sea turtle, and soft-shelled turtle). In the non-duplicate group, of the 49 DBD, 21 of them were significantly different (MWU,  $P > 0.01$ ; Table 1). A majority of these families experienced a reduction in DBD presence, with an average decrease of 51.14%, while only 2 families showed an increase (Homeobox\_KN, and HTH\_psq), though this increase was substantial (~393%). In the duplicate group, only 11 showed a significant difference (Table 2), also showing a general reduction in DBD presence. In this category, all families decreased in number (~60%), with evidence of complete loss of members with certain DND combinations

(Forkhead, HMG box, MH1, and Tub). Most of these DBD families are not significantly different in proteins with only one representative DBD (Table 1).

### *Transcription Factor DBD Characterization*

We tried to assess any additional commonalities of transcription factor families (beyond DNA binding, and general gene expression) that underwent a change between reptiles and birds, using gene ontology (GO) terms associated with the protein sequences. This was performed on the 21 TF DBD families (see previous section; Table 1). This resulted in additional characterization of 21,463 proteins across the 47 birds and 5 reptiles. The GO families associated with the Cellular and Molecular functions were variations on DNA-binding, and Cell parts/Nucleus, while the Biological Processes were those associated with various metabolic (nitrogen, macromolecule, nucleic acid, protein) and developmental processes (at Level 3). Of those GO term classes pertaining to development, the specific were showed the most common terms were those associated with skeletal development, immune system development, circulatory system development, hematopoietic/blood development, embryonic morphogenesis, nervous system development, and animal organ development (Figure 1).

## **DISCUSSION**

The results of this analysis suggest there was an overall major reduction in transcription factor families across the avian lineage, and did not show any major instances of substantial expansions associated with any specific DBD family. Although avian and reptile genomes are generally similarly sized at present, a reduction in genome

size between reptiles and birds did occur in the saurischian dinosaur lineage between 230 and 250 million years ago (Organ *et al.* 2007). This coincided with a major reduction in repetitive elements, intron size, and even whole-scale loss of syntenic protein coding regions, typically attributed to the general metabolic requirements for flight (Organ & Shedlock 2009; Zhang & Edwards 2012; Lovell *et al.* 2014; Wright *et al.* 2014; Zhang *et al.* 2014b); thus, the reduction of TF DBD families seen in these results, potentially mirror the general genome reduction seen in other studies. Despite this fact, it is somewhat surprising to not see any particular instances of TF DBD family expansions, since increases in the number of regulatory proteins, including TFs, have frequently been connected to phenotypic innovations (Miyata & Suga 2001; Levine & Tjian 2003; Kusserow *et al.* 2005; Schmitz *et al.* 2016).

Nonetheless, such a pattern suggests that TF DBD families are not correlated with avian diversification, and can possibly be ascribed to other factors, such as protein-coding family duplications, or cis-regulatory changes, instead (Zhang *et al.* 2014b; Seki *et al.* 2017). Duplications of protein-coding gene families are known to play a major role in species evolution: redundancy provides a medium for novelty while maintaining initial function (Lynch & Conery 2000; Zhang 2003). However, another possibility is that the absence of an increase TF DBD between reptiles and birds may instead suggest changes in TF modularity, appearing through increased interconnectivity/occurrence of DBD and domains involved in protein-protein interactions. Thus, surveying domains associated with protein-protein interactions could potentially reveal an additional facet to how TF families may have evolved during the reptile-bird transition, in conjunction with a reduction in genome size; an increase or an enrichment in these domains would hint at a



scenario of TF families being re-organized, or families functions are being specialized, thus altering their expression profiles or binding properties, affecting the expression of many target genes, often with a major functional impact (Lespinet *et al.* 2002).

It is interesting to note that the TF DBD families who experienced the sharpest declines were ones associated with heart development (T-box), vocal learning (Forkhead), feather formation (Ets), wing development (HMG box), sex determination (HMG box, DM), immune function (HMG box, IRF, STAT bind, RHD), and aspects of blood (Runt, GATA) (Table 3). All of these aspects have been subjected to major physiological/developmental changes between reptiles and birds (Brusatte *et al.* 2015; Chatterjee 2015), especially the development of feathers from scales (Chuong *et al.* 2000), sex-determination through chromosomal differences rather than temperature (Sarre *et al.* 2004), and even changes in immune system functionality (Zimmerman *et al.* 2010). Although, it is difficult to speculate how reductions in these major families may be associated with such changes seen between avian and reptile lineages.

## CONCLUSIONS

Ultimately, these results represent the first foray into TF DBD characterization between the avian and reptile genomes. In addition, the results of these analyses strengthen the notion that cis-regulatory regions and protein-coding gene families are behind much of the extant avian diversification. Still, whole-scale reductions in TF DBD families in the genome likely posed a significant hurdle, unless these families were comprised of multiple members that were functionally redundant. Overall, the results of this analyses represent a broad characterization of TF DBD family composition in birds,

thus the specific composition of TF families should be probed further, especially those with the largest reductions seen in this study. In addition, whether non-major TF DBD families have also seen a general reduction requires future analysis, as does the composition of domains associated with protein-protein interactions.

## **Acknowledgements**

We would like to acknowledge our PhD advisors (Kevin McCracken and William Browne) who allowed us to explore other topics and work on side-projects, at the same time as our thesis work.

## **Author contributions**

AMG and JSP conceived, designed the study, and performed the data-collection. AMG wrote the manuscript. All authors discussed the results and implications, and commented on the manuscript.

## **Supplemental Information**

SUPP Tables 1 - 53: Individual TF DBD output tables for each of the bird and reptile species used.

## References

- Alonso CR (2002) Hox proteins: sculpting body parts by activating localized cell death. *Current Biology* **12**, R776-R778.
- Anrather J, Racchumi G, Iadecola C (2005) cis-Acting element-specific transcriptional activity of differentially phosphorylated nuclear factor- $\kappa$  B. *Journal of Biological Chemistry* **280**, 244-252.
- Britten RJ, Davidson EH (1969) Gene regulation for higher cells: a theory. *Science* **165**, 349-357.
- Brusatte SL, O'Connor JK, Jarvis ED (2015) The origin and diversification of birds. *Current Biology* **25**, R888-R898.
- Carroll SB (2008) Evo-devo and an expanding evolutionary synthesis: a genetic theory of morphological evolution. *Cell* **134**, 25-36.
- Charoensawan V, Wilson D, Teichmann SA (2010) Lineage-specific expansion of DNA-binding transcription factor families. *Trends in Genetics* **26**, 388-393.
- Chatterjee S (2015) *The rise of birds: 225 million years of evolution* JHU Press.
- Chuong C-M, Chodankar R, Widelitz RB, Jiang T-X (2000) Evo-devo of feathers and scales: building complex epithelial appendages. *Current opinion in genetics & development* **10**, 449.
- Conesa A, Götz S, García-Gómez JM, *et al.* (2005) Blast2GO: a universal tool for annotation, visualization and analysis in functional genomics research. *Bioinformatics* **21**, 3674-3676.
- de Mendoza A, Sebé-Pedrós A, Šestak MS, *et al.* (2013) Transcription factor evolution in eukaryotes and the assembly of the regulatory toolkit in multicellular lineages. *Proceedings of the National Academy of Sciences* **110**, E4858-E4866.
- Eddy SR (2011) Accelerated profile HMM searches. *PLoS computational biology* **7**, e1002195.
- Eöry L, Gilbert MTP, Li C, *et al.* (2015) Avianbase: a community resource for bird genomics. *Genome biology* **16**, 21.
- Escalante CR, Yie J, Thanos D, Aggarwal AK (1998) Structure of IRF-1 with bound DNA reveals determinants of interferon regulation. *Nature* **391**, 103-106.
- Gill FB, Wright MT (2006) *Birds of the world: recommended English names* Princeton University Press Princeton, New Jersey.
- Hannenhalli S, Kaestner KH (2009) The evolution of Fox genes and their role in development and disease. *Nature reviews. Genetics* **10**, 233.
- Jarvela AMC, Hinman VF (2015) Evolution of transcription factor function as a mechanism for changing metazoan developmental gene regulatory networks. *EvoDevo* **6**, 3.
- Kagoshima H, Shigesada K, Satake M, *et al.* (1993) The runt domain identifies a new family of heterometric transcriptional regulators. *Trends in Genetics* **9**, 338-341.
- King M-C, Wilson AC (1975) *Evolution at two levels in humans and chimpanzees* na.
- Kisseleva T, Bhattacharya S, Braunstein J, Schindler C (2002) Signaling through the JAK/STAT pathway, recent advances and future challenges. *Gene* **285**, 1-24.

- Kusserow A, Pang K, Sturm C, *et al.* (2005) Unexpected complexity of the Wnt gene family in a sea anemone. *Nature* **433**, 156-160.
- Lehti-Shiu MD, Panchy N, Wang P, Uygun S, Shiu S-H (2016) Diversity, expansion, and evolutionary novelty of plant DNA-binding transcription factor families. *Biochimica et Biophysica Acta (BBA)-Gene Regulatory Mechanisms*.
- Lespinet O, Wolf YI, Koonin EV, Aravind L (2002) The role of lineage-specific gene family expansion in the evolution of eukaryotes. *Genome research* **12**, 1048-1059.
- Levine M, Tjian R (2003) Transcription regulation and animal diversity. *Nature* **424**, 147-151.
- Liu H, Chang L-H, Sun Y, Lu X, Stubbs L (2014) Deep vertebrate roots for mammalian zinc finger transcription factor subfamilies. *Genome biology and evolution* **6**, 510-525.
- Lotze MT, Tracey KJ (2005) High-mobility group box 1 protein (HMGB1): nuclear weapon in the immune arsenal. *Nature Reviews Immunology* **5**, 331-342.
- Lovell PV, Wirthlin M, Wilhelm L, *et al.* (2014) Conserved syntenic clusters of protein coding genes are missing in birds. *Genome biology* **15**, 1.
- Lynch M, Conery JS (2000) The evolutionary fate and consequences of duplicate genes. *Science* **290**, 1151-1155.
- Miyata T, Suga H (2001) Divergence pattern of animal gene families and relationship with the Cambrian explosion. *Bioessays* **23**, 1018-1027.
- Morgan BA, Orkin RW, Noramly S, Perez A (1998) Stage-specific effects of Sonic Hedgehog Expression in the epidermis. *Developmental biology* **201**, 1-12.
- Nadimpalli S, Persikov AV, Singh M, Lieb JD (2015) Pervasive variation of transcription factor orthologs contributes to regulatory network evolution. *PLoS genetics* **11**, e1005011-e1005011.
- O'Brien SJ, Haussler D, Ryder O (2014) The birds of Genome 10K. *GigaScience* **3**, 32.
- Organ CL, Shedlock AM (2009) Palaeogenomics of pterosaurs and the evolution of small genome size in flying vertebrates. *Biology letters* **5**, 47-50.
- Organ CL, Shedlock AM, Meade A, Pagel M, Edwards SV (2007) Origin of avian genome size and structure in non-avian dinosaurs. *Nature* **446**, 180-184.
- Patient RK, McGhee JD (2002) The GATA family (vertebrates and invertebrates). *Current opinion in genetics & development* **12**, 416-422.
- Plageman TF, Yutzey KE (2005) T - box genes and heart development: Putting the "T" in heart. *Developmental Dynamics* **232**, 11-20.
- Sarre SD, Georges A, Quinn A (2004) The ends of a continuum: genetic and temperature - dependent sex determination in reptiles. *Bioessays* **26**, 639-645.
- Scharff C, Haesler S (2005) An evolutionary perspective on FoxP2: strictly for the birds? *Current opinion in neurobiology* **15**, 694-703.
- Schmitz JF, Zimmer F, Bornberg-Bauer E (2016) Mechanisms of transcription factor evolution in Metazoa. *Nucleic acids research*, gkw492.
- Seki R, Li C, Fang Q, *et al.* (2017) Functional roles of Aves class-specific cis-regulatory elements on macroevolution of bird-specific features. *Nature Communications* **8**, 14229.

- Smith CA, Roeszler KN, Ohnesorg T, *et al.* (2009) The avian Z-linked gene DMRT1 is required for male sex determination in the chicken. *Nature* **461**, 267-271.
- Wagner GP, Lynch VJ (2008) The gene regulatory logic of transcription factor evolution. *Trends in Ecology & Evolution* **23**, 377-385.
- Wagner GP, Lynch VJ (2010) Evolutionary novelties. *Current Biology* **20**, R48-R52.
- Wallis M, Waters P, Graves JA (2008) Sex determination in mammals—before and after the evolution of SRY. *Cellular and molecular life sciences* **65**, 3182-3195.
- Welten M, Verbeek FJ, Meijer AH, Richardson MK (2005) Gene expression and digit homology in the chicken embryo wing. *Evolution & development* **7**, 18-28.
- Wittkopp PJ, Kalay G (2011) Cis-regulatory elements: molecular mechanisms and evolutionary processes underlying divergence. *Nature Reviews Genetics* **13**, 59-69.
- Wray GA (2007) The evolutionary significance of cis-regulatory mutations. *Nature Reviews Genetics* **8**, 206-216.
- Wright NA, Gregory TR, Witt CC (2014) Metabolic 'engines' of flight drive genome size reduction in birds **281**, 20132780.
- Zhang G, Li B, Li C, *et al.* (2014a) Comparative genomic data of the Avian Phylogenomics Project. *GigaScience* **3**, 26.
- Zhang G, Li C, Li Q, *et al.* (2014b) Comparative genomics reveals insights into avian genome evolution and adaptation. *Science* **346**, 1311-1320.
- Zhang J (2003) Evolution by gene duplication: an update. *Trends in Ecology & Evolution* **18**, 292-298.
- Zhang Q, Edwards SV (2012) The evolution of intron size in amniotes: a role for powered flight? *Genome biology and evolution* **4**, 1033-1043.
- Zimmerman L, Vogel L, Bowden R (2010) Understanding the vertebrate immune system: insights from the reptilian perspective. *Journal of Experimental Biology* **213**, 661-671.

**Table 1:** Non-duplicate DNA-Binding Domains (DBD) that are significantly different between reptiles, and birds (Mann-Whitney U test,  $P < 0.01$ ): “reptiles” represents the average number across the 5 lineages, and “birds” represents the average across the 48 lineages.

| <b>DNA binding domain</b> | <b>Reptiles</b> | <b>Birds</b> | <b>More/Less in Birds</b> | <b>P-value</b> |
|---------------------------|-----------------|--------------|---------------------------|----------------|
| <i>MADF_DNA_bdg</i>       | 121.60          | 2.94         | Less                      | 7.70E-07       |
| <i>zf-BED</i>             | 9.60            | 2.89         | Less                      | 7.70E-07       |
| <i>Homeobox</i>           | 62.40           | 31.09        | Less                      | 5.39E-06       |
| <i>T-box</i>              | 20.60           | 11.38        | Less                      | 1.77E-05       |
| <i>Fork_head</i>          | 37.40           | 19.55        | Less                      | 3.23E-05       |
| <i>zf-C2H2</i>            | 480.20          | 210.49       | Less                      | 3.23E-05       |
| <i>Ets</i>                | 12.00           | 8.09         | Less                      | 1.37E-04       |
| <i>HMG_box</i>            | 50.40           | 32.51        | Less                      | 1.42E-04       |
| <i>GATA</i>               | 9.80            | 4.87         | Less                      | 1.62E-04       |
| <i>Homeobox_KN</i>        | 0.20            | 1.57         | More                      | 5.82E-04       |
| <i>IRF</i>                | 9.60            | 5.36         | Less                      | 8.06E-04       |
| <i>STAT_bind</i>          | 6.40            | 3.57         | Less                      | 0.001040416    |
| <i>DM</i>                 | 3.60            | 0.85         | Less                      | 0.001419029    |
| <i>P53</i>                | 3.80            | 1.83         | Less                      | 0.001921538    |
| <i>Runt</i>               | 3.80            | 1.91         | Less                      | 0.002920399    |
| <i>CG-1</i>               | 1.60            | 0.49         | Less                      | 0.003327485    |
| <i>ARID</i>               | 15.20           | 10.77        | Less                      | 0.003717641    |
| <i>SRF-TF</i>             | 6.20            | 2.91         | Less                      | 0.004266322    |
| <i>HTH_psq</i>            | 1.20            | 2.43         | More                      | 0.0083064      |
| <i>Tub</i>                | 5.40            | 3.15         | Less                      | 0.008685782    |
| <i>RHD</i>                | 9.60            | 6.98         | Less                      | 0.009252932    |

**Table 2:** Duplicate DNA-Binding Domains (DBD) that are significantly different between reptiles, and birds (Mann-Whitney U test,  $P < 0.01$ ): “reptiles” represents the average number across the 5 lineages, and “birds” represents the average across the 48 lineages.

| <b>DNA binding domain</b>  | <b>Reptiles</b> | <b>Birds</b> | <b>More/Less in Birds</b> | <b>P-value</b> |
|----------------------------|-----------------|--------------|---------------------------|----------------|
| <i>YL1 nuclear protein</i> | 2.2             | 0.51         | Less                      | 1.62E-04       |
| <i>zf-MIZ</i>              | 1               | 0.04         | Less                      | 3.59E-04       |
| <i>TEA</i>                 | 1.2             | 0.06         | Less                      | 4.29E-04       |
| <i>HLH</i>                 | 4.6             | 1.21         | Less                      | 5.93E-04       |
| <i>Fork_head</i>           | 0.8             | 0            | Less                      | 9.05E-04       |
| <i>HMG_box</i>             | 1               | 0            | Less                      | 9.05E-04       |
| <i>MH1</i>                 | 0.6             | 0            | Less                      | 9.05E-04       |
| <i>Tub</i>                 | 0.6             | 0            | Less                      | 9.05E-04       |
| <i>bZIP_Maf</i>            | 35              | 25.13        | Less                      | 0.001431342    |
| <i>MADF_DNA_bdg</i>        | 3.8             | 0.06         | Less                      | 0.005172839    |
| <i>bZIP_2</i>              | 51.2            | 38.23        | Less                      | 0.007530705    |



**Table 3:** Significantly different DBD categories (see Table 1), and their respective biological function

| <b>Domain</b>      | <b>Domain "Function"</b>          | <b>Citation</b>                                       |
|--------------------|-----------------------------------|-------------------------------------------------------|
| <i>zf-BED</i>      | general                           | PFAM: PF02892                                         |
| <i>Homeobox</i>    | general development               | PFAM: PF00046                                         |
| <i>T-box</i>       | heart development                 | (Plageman & Yutzey 2005)                              |
| <i>Fork_head</i>   | general                           | (Hannenhalli & Kaestner 2009)                         |
|                    | vocal learning                    | (Scharff & Haesler 2005)                              |
| <i>zf-C2H2</i>     | general                           | PFAM: PF00096                                         |
| <i>Ets</i>         | feather formation                 | (Morgan <i>et al.</i> 1998)                           |
| <i>HMG_box</i>     | wing development                  | (Welten <i>et al.</i> 2005)                           |
|                    | sex determination                 | (Wallis <i>et al.</i> 2008)                           |
|                    | immune function                   | (Lotze & Tracey 2005)                                 |
| <i>GATA</i>        | blood                             | (Patient & McGhee 2002)                               |
| <i>Homeobox_KN</i> | anterior-posterior axis formation | (Alonso 2002)<br>InterPro: IPR01356                   |
| <i>IRF</i>         | immune function                   | (Escalante <i>et al.</i> 1998)<br>SMART: SM00348      |
| <i>STAT_bind</i>   | immune function                   | (Kisseleva <i>et al.</i> 2002)<br>InterPro: IPR012345 |
| <i>DM</i>          | sex determination/differentiation | (Smith <i>et al.</i> 2009)<br>InterPro: IPR001275     |
| <i>P53</i>         | cell cycle (general)              | InterPro: IPR011615                                   |
| <i>Runt</i>        | blood                             | (Kagoshima <i>et al.</i> 1993)<br>InterPro: IPR013524 |
| <i>CG-1</i>        | general                           | PFAM: PF03859                                         |
| <i>ARID</i>        | general                           | PFAM: PF01388                                         |
| <i>SRF-TF</i>      | cell cycle (general)              | PFAM: PF00319                                         |
| <i>HTH_psq</i>     | cell cycle (general)              | PFAM: [F05225                                         |
| <i>Tub</i>         | cell cycle (general)              | PFAM: PF01167                                         |
| <i>RHD</i>         | immune/p53                        | (Anrather <i>et al.</i> 2005)<br>InterPro: IPR011539  |

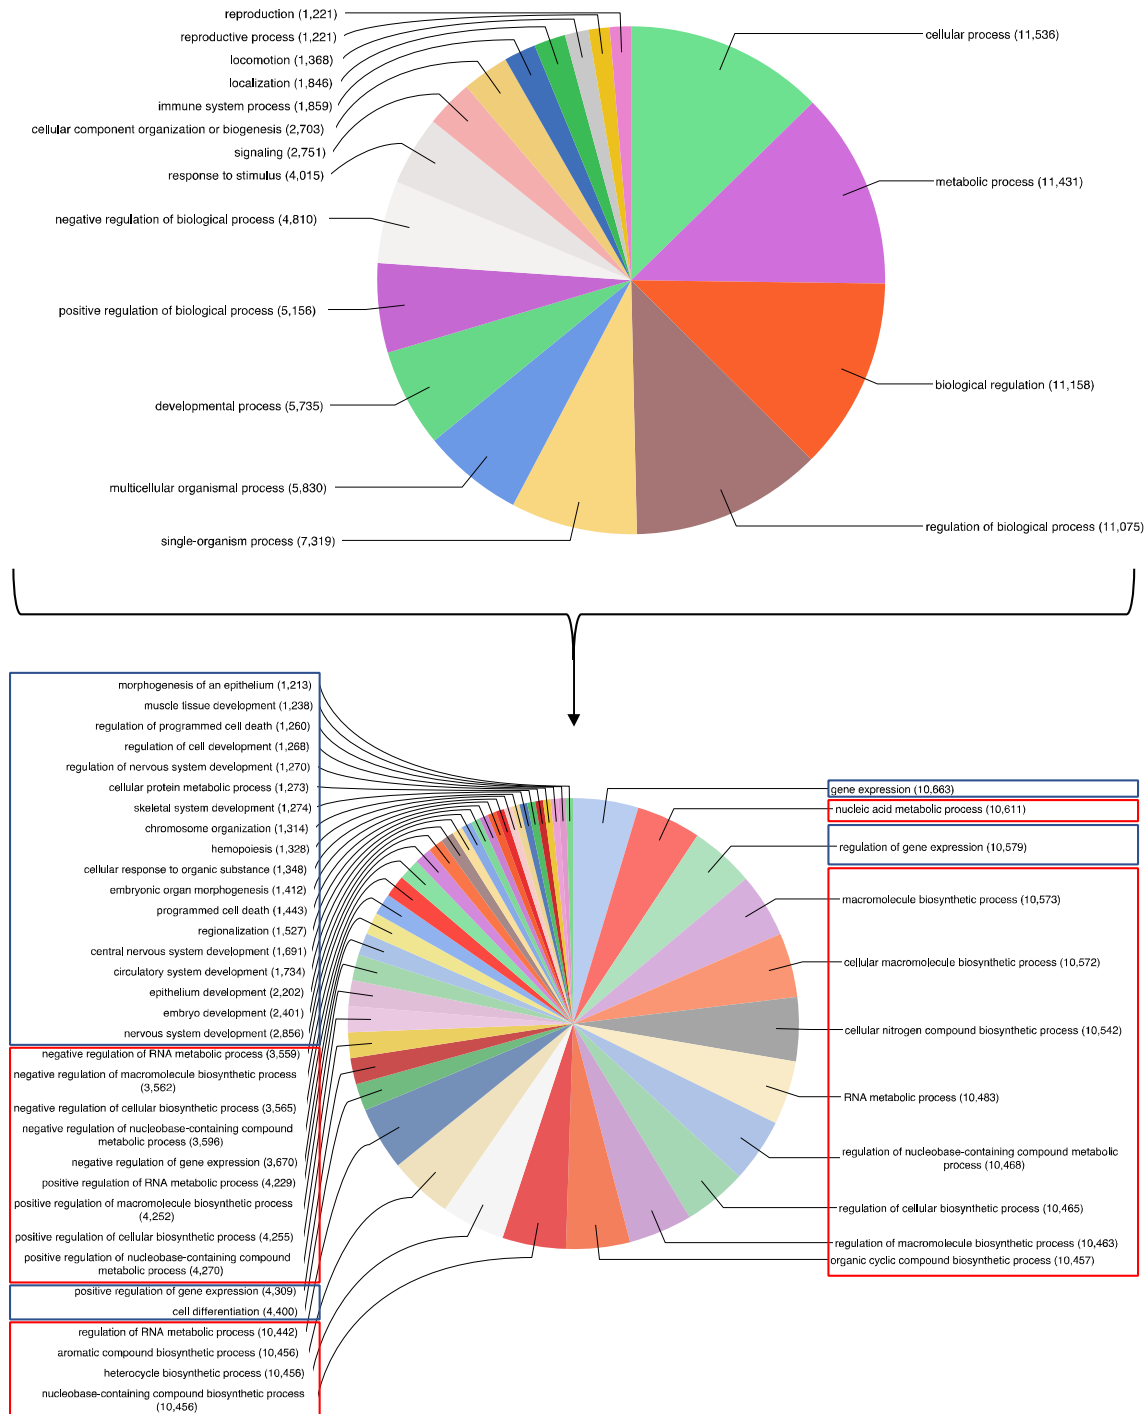

**Figure 1: Gene Ontology (GO) terms associated with the significantly different counts of DNA-Binding Domains between reptiles and birds – blue, developmental GO terms; red, metabolism GO terms; top panel level 2 (more general), bottom panel level 5 (more specific).**
